# Supplementary material for: Spray coated ultrathin films from aqueous tungsten molybdenum oxide nanoparticle ink for high contrast electrochromic applications
Source: Royal Society of Chemistry journal article supplement (doi:10.1039/c5tc02802g), 2015-11-16
Supplement: c5tc02802g1.pdf [file c5tc02802g1.pdf]

Supplementary Information

**Spray coated ultrathin films from aqueous tungsten  
molybdenum oxide nanoparticle ink for high contrast  
electrochromic application**

**Haizeng Li,<sup>a,b</sup> Jingwei Chen,<sup>b</sup> Mengqi Cui,<sup>b</sup> Guofa Cai,<sup>b</sup> Alice Lee-Sie Eh,<sup>b</sup> Pooi See Lee,  
\*<sup>b</sup> Hongzhi Wang,\*<sup>a</sup> Qinghong Zhang<sup>c</sup> and Yaogang Li\*<sup>c</sup>**

<sup>a</sup> State Key Laboratory for Modification of Chemical Fibers and Polymer Materials, College of Materials Science and Engineering, Donghua University, Shanghai 201620, P. R. China. E-mail: wanghz@dhu.edu.cn; Fax: +86-021-67792855; Tel: +86-021-67792881

<sup>b</sup> School of Materials Science and Engineering, Nanyang Technological University, 639798, Singapore. E-mail: pslee@ntu.edu.sg

<sup>c</sup> Engineering Research Center of Advanced Glasses Manufacturing Technology, Ministry of Education, College of Materials Science and Engineering, Donghua University, Shanghai 201620, P. R. China. E-mail: yaogang\_li@dhu.edu.cn; Fax: +86-021-67792855; Tel: +86-021-67792526

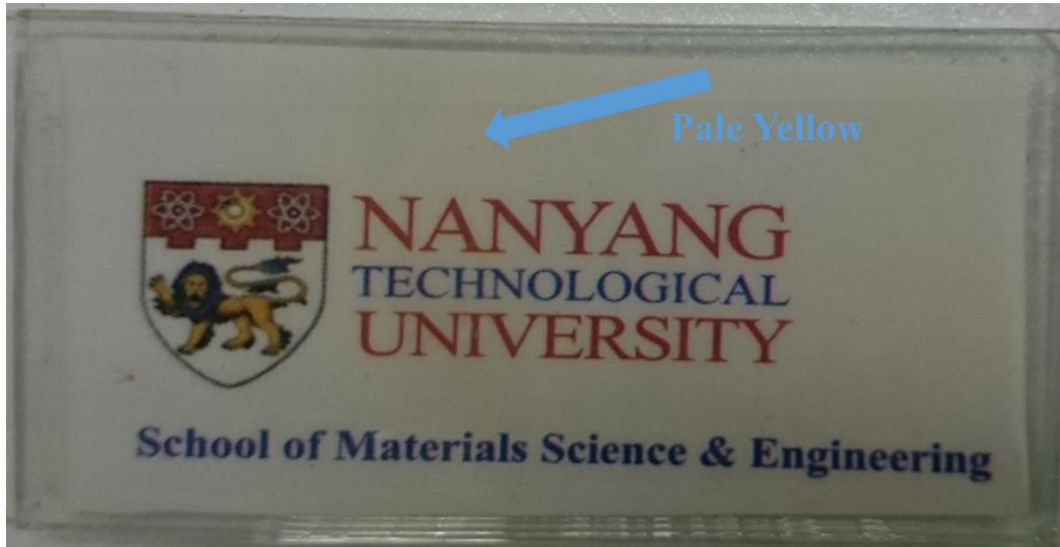

Fig. S1 Digital photo of the spray coated  $W_{0.71}Mo_{0.29}O_3$  film showing pale-yellow color, which suggests the elimination of oxygen vacancies

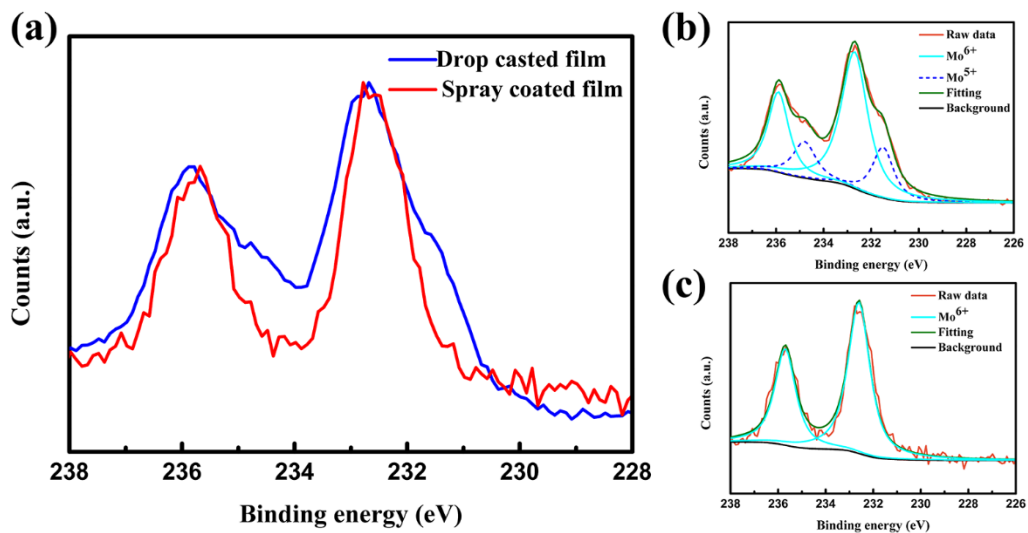

Fig. S2 (a) Comparison of Mo 3d XPS of the drop casted film and spray coated film, the corresponding fitted spectrum of drop casted film (b) and spray coated film (c).

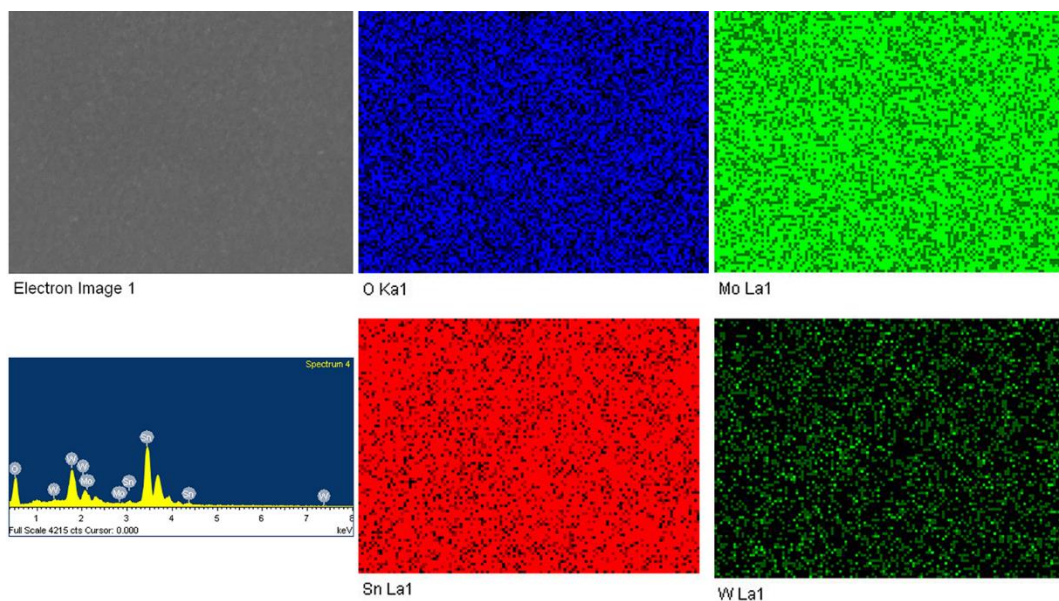

Fig. S3 EDS mapping image of the spray coated  $W_{0.71}Mo_{0.29}O_3$  film.

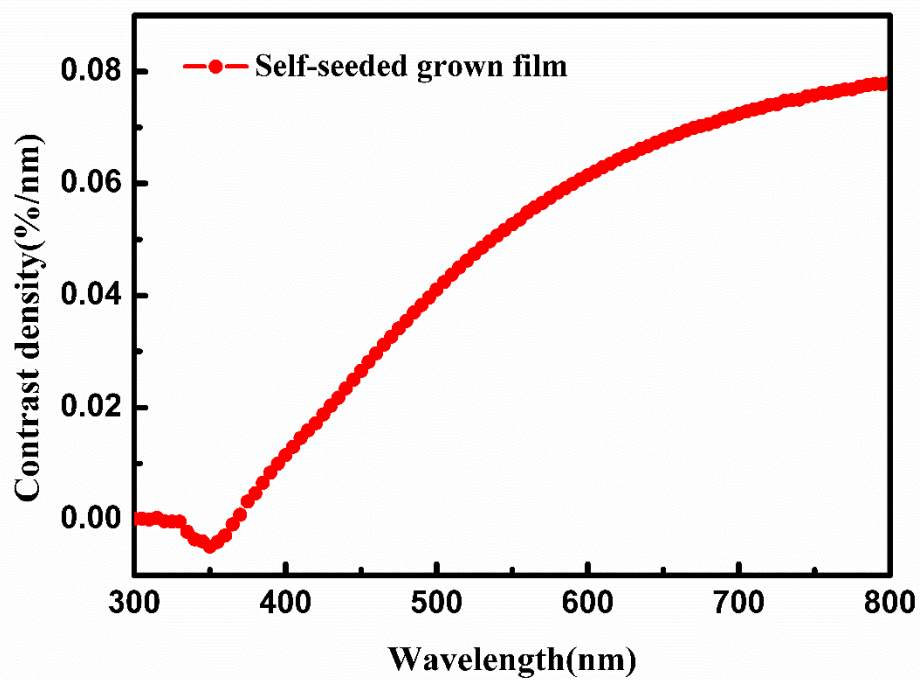

Fig. S4 Contrast density of our previous reported self-seeded grown  $WO_3 \cdot 0.33H_2O$  film.<sup>1</sup>

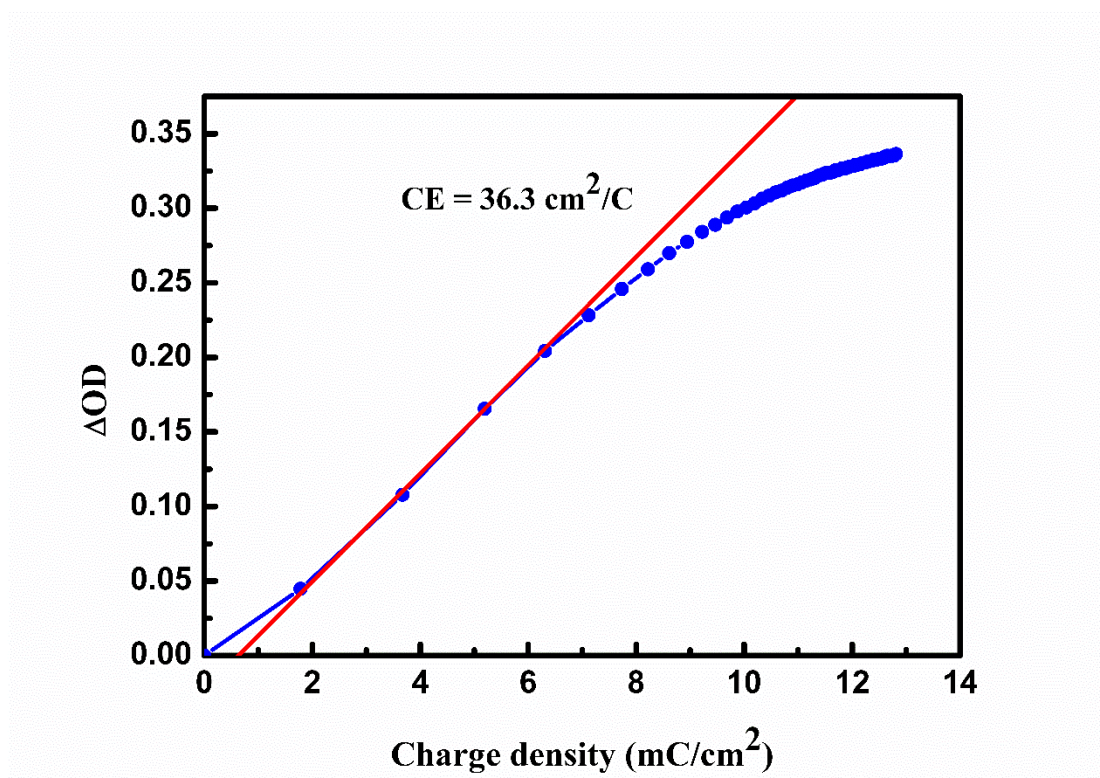

Fig. S5 OD variation with respect to the charge density for the spray coated  $W_{0.71}Mo_{0.29}O_3$  film measured at 632.8 nm at a potential of - 1.0 V.

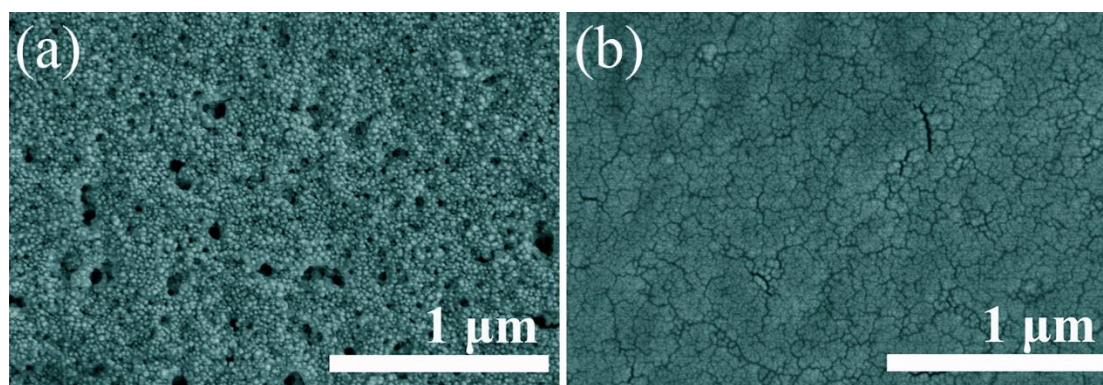

Fig. S6 SEM images of (a) spray coated film and (b) drop casted film after 2000 electrochromic cycles.

1. H. Li, G. Shi, H. Wang, Q. Zhang and Y. Li, *J. Mater. Chem. A*, 2014, **2**, 11305.
